# Supplementary material
Source: PubMed Central journal article supplement (PMC9393068)

## WEB MATERIAL

**Title:** Age, period, and cohort effects of internalizing symptoms among US students and the influence of self-reported frequency of  $\geq 7$  hours sleep attainment: Results from the Monitoring the Future Survey 1991-2019

**Authors:** Navdep Kaur, Ava D. Hamilton, Qixuan Chen, Deborah Hasin, Magdalena Cerda, Silvia S. Martins, Katherine M. Keyes

### Table of Contents:

Web Table 1. Comparison of students who were include or excluded from the full-sample loneliness AP model by sociodemographics

Web Figure 1. Hierarchical age-period estimates of period effects of loneliness among 8<sup>th</sup>, 10<sup>th</sup>, and 12<sup>th</sup> graders in the Monitoring the Future Study (1991-2019), with and without adjusting for self-reported frequency of attaining  $\geq 7$  hours of sleep most days/nearly every day/every day

Web Figure 2-5. Hierarchical age-period-cohort estimates of period and cohort effects of internalizing symptoms among 8<sup>th</sup>, 10<sup>th</sup>, and 12<sup>th</sup> graders in the Monitoring the Future Study (1991-2019). A.) Period Effect; B.) Cohort Effect

Web Figure 6-8. Subgroup analyses of hierarchical age-period estimates of period effects of loneliness among 8<sup>th</sup>, 10<sup>th</sup>, and 12<sup>th</sup> graders in the Monitoring the Future Study (1991-2019)

Web Table 2. Multinomial Logistic Regression of Loneliness among 8<sup>th</sup>, 10<sup>th</sup>, and 12<sup>th</sup> graders in the Monitoring the Future Study (1991-2019)

Web Figure 9-11. Hierarchical age-period estimates of period effects of internalizing symptoms among 8<sup>th</sup>, 10<sup>th</sup>, and 12<sup>th</sup> graders in the Monitoring the Future Study (1991-2019)

Web Figure 12. Sensitivity analysis of age-period-cohort estimates of loneliness among 8<sup>th</sup>, 10<sup>th</sup>, and 12<sup>th</sup> graders in the Monitoring the Future Study (1991-2019) using the intrinsic estimator. A.) Age, years; B.) Survey Year; C.) Birth Cohort Year (N=324,179)

Web Table 1. Comparison of students who were include or excluded from the full-sample loneliness AP model by sociodemographics<sup>a</sup>

|                               |                                       | <b>Excluded</b> |              | <b>Included</b> |              |
|-------------------------------|---------------------------------------|-----------------|--------------|-----------------|--------------|
|                               |                                       | <b>N</b>        | <b>Row %</b> | <b>N</b>        | <b>Row %</b> |
| Sex                           | Male                                  | 70,478          | 39.28        | 108,926         | 60.72        |
|                               | Female                                | 67,581          | 35.95        | 120,420         | 64.05        |
|                               | Missing                               | 14,034          |              |                 |              |
| Past-year drinking            | Yes                                   | 69,601          | 36.48        | 121,167         | 63.52        |
|                               | No                                    | 58,403          | 35.06        | 108,179         | 64.94        |
|                               | Missing                               | 24,089          |              |                 |              |
| Past-year cannabis use        | Yes                                   | 32,639          | 38.66        | 51,795          | 61.34        |
|                               | No                                    | 107,981         | 37.82        | 177,551         | 62.18        |
|                               | Missing                               | 11,473          |              |                 |              |
| Past-year other substance use | Yes                                   | 9,875           | 23.52        | 32,104          | 76.48        |
|                               | No                                    | 71,106          | 26.50        | 197,242         | 73.50        |
|                               | Missing                               | 71,112          |              |                 |              |
| GPA                           | B- or less                            | 55,842          | 41.27        | 79,475          | 58.73        |
|                               | B or greater                          | 81,293          | 35.17        | 149,871         | 64.83        |
|                               | Missing                               | 14,958          |              |                 |              |
| Age                           | 10-11                                 | 103             | 57.22        | 77              | 42.78        |
|                               | 12-13                                 | 21,722          | 31.83        | 46,519          | 68.17        |
|                               | 14-15                                 | 43,238          | 28.23        | 109,943         | 71.77        |
|                               | 16-17                                 | 43,909          | 39.52        | 67,189          | 60.48        |
|                               | 18+                                   | 32,498          | 85.26        | 5,618           | 14.74        |
|                               | Missing                               | 8,300           |              |                 |              |
| Race                          | Black                                 | 24,931          | 51.00        | 23,953          | 49.00        |
|                               | White                                 | 68,389          | 30.65        | 154,761         | 69.35        |
|                               | Hispanic                              | 22,602          | 48.47        | 24,029          | 51.53        |
|                               | Other                                 | 17,871          | 40.18        | 26,603          | 59.82        |
|                               | Missing                               | 18,300          |              |                 |              |
| Parental education            | Neither parent completed college      | 62,053          | 37.68        | 102,629         | 62.32        |
|                               | At least one parent completed college | 59,008          | 31.77        | 126,717         | 68.23        |
|                               | Missing                               | 31,032          |              |                 |              |

<sup>a</sup>Note: A total of 381,439 students participated in the study from 1991-2019 and were randomly assigned to the survey sub-forms containing questions about loneliness. However, due to data missingness the sample for the full-sample loneliness AP model was 229,346.

Web Figure 1. Hierarchical age-period estimates of period effects of loneliness among 8<sup>th</sup>, 10<sup>th</sup>, and 12<sup>th</sup> graders in the Monitoring the Future Study (1991-2019), with and without adjusting for self-reported frequency of attaining  $\geq 7$  hours of sleep most days/nearly every day/every day<sup>a</sup>

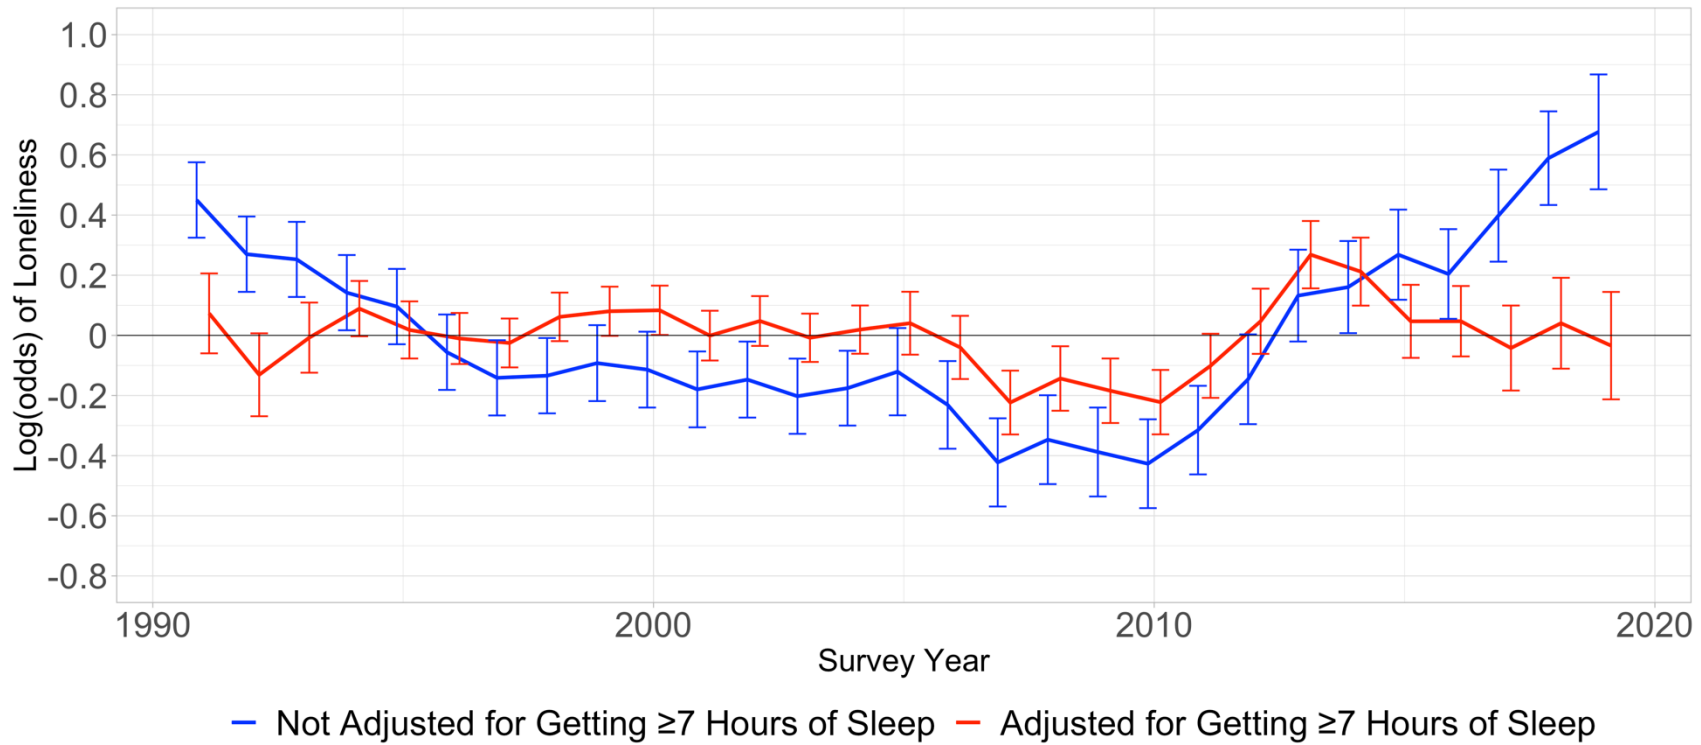

<sup>a</sup>Note: Models also adjusted for sex (male vs. female), race/ethnicity (non-Hispanic white, non-Hispanic Black, Hispanic, other), parental education (either parent had some college or less vs. completed college or more, as reported by the adolescent), GPA (B- or less vs. B or higher), survey implementation technique (paper vs. tablet), and past-year cannabis/alcohol/other drug use. Drugs in the “other substance use” category vary by grade: for 12th graders we include LSD, other hallucinogens, cocaine, amphetamines, sedatives, tranquilizers, heroin, narcotics, crack, and other forms of cocaine. For 8th and 10th graders we do not include heroin, narcotics, or sedatives. (N=229,346)

Web Figure 2. Hierarchical age-period-cohort estimates of period and cohort effects of loneliness among 8<sup>th</sup>, 10<sup>th</sup>, and 12<sup>th</sup> graders in the Monitoring the Future Study (1991-2019). A.) Period Effect; B.) Cohort Effect<sup>a</sup>

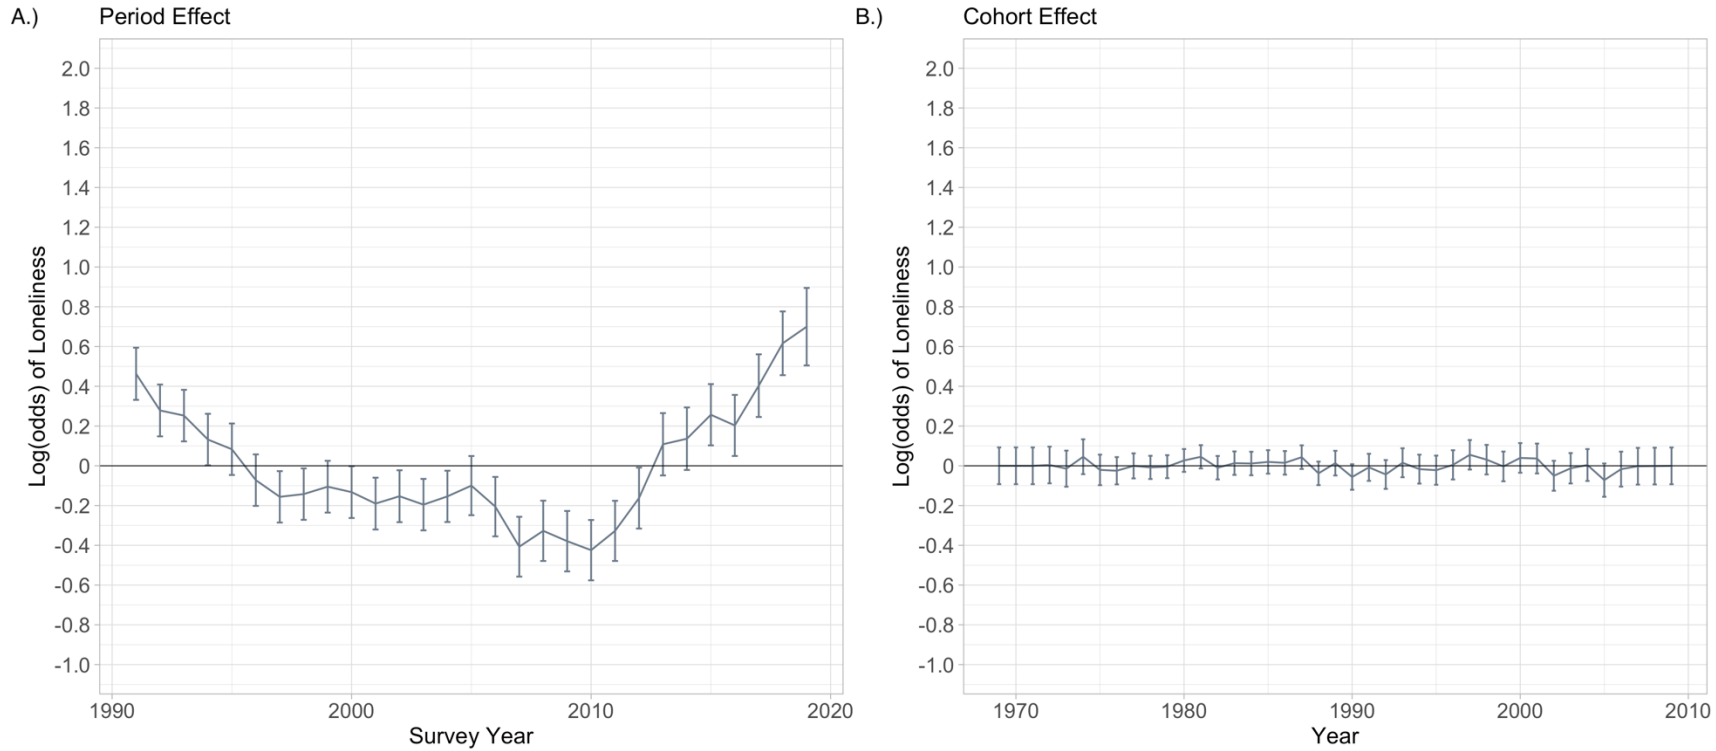

<sup>a</sup>Note: Model also adjusted for sex (male vs. female), race/ethnicity (non-Hispanic white, non-Hispanic Black, Hispanic, other), parental education (either parent had some college or less vs. completed college or more, as reported by the adolescent), GPA (B- or less vs. B or higher), survey implementation technique (paper vs. tablet), and past-year cannabis/alcohol/other drug use. Drugs in the “other substance use” category vary by grade: for 12th graders we include LSD, other hallucinogens, cocaine, amphetamines, sedatives, tranquilizers, heroin, narcotics, crack, and other forms of cocaine. For 8th and 10th graders we do not include heroin, narcotics, or sedatives. (N=229,346)

Web Figure 3. Hierarchical age-period-cohort estimates of period and cohort effects of high self-derogation among 8<sup>th</sup>, 10<sup>th</sup>, and 12<sup>th</sup> graders in the Monitoring the Future Study (1991-2019). A.) Period Effect; B.) Cohort Effect<sup>a</sup>

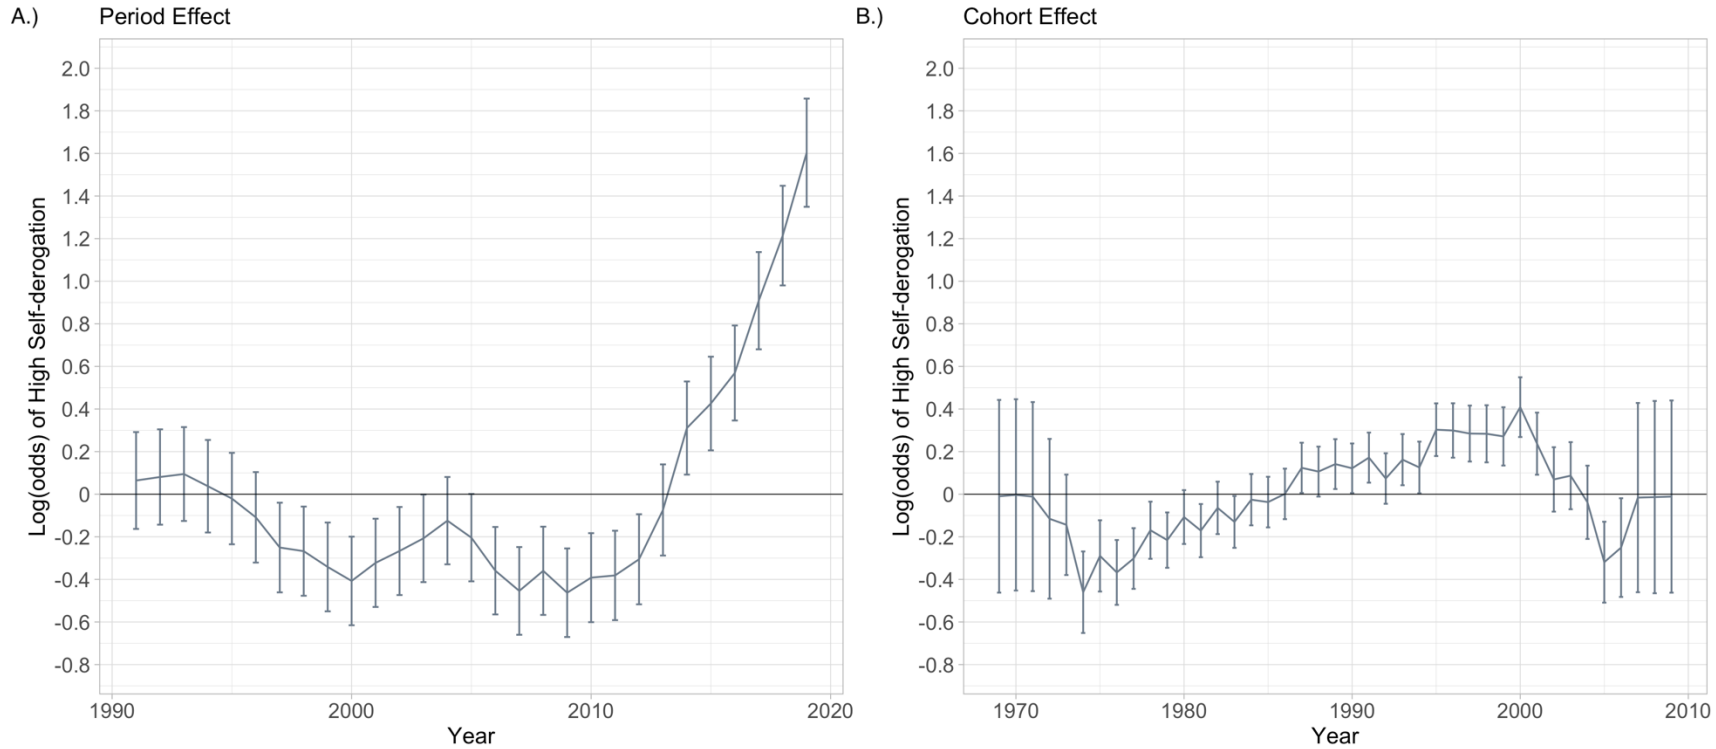

<sup>a</sup>Note: Model also adjusted for sex (male vs. female), race/ethnicity (non-Hispanic white, non-Hispanic Black, Hispanic, other), parental education (either parent had some college or less vs. completed college or more, as reported by the adolescent), GPA (B- or less vs. B or higher), survey implementation technique (paper vs. tablet), and past-year cannabis/alcohol/other drug use. Drugs in the “other substance use” category vary by grade: for 12<sup>th</sup> graders we include LSD, other hallucinogens, cocaine, amphetamines, sedatives, tranquilizers, heroin, narcotics, crack, and other forms of cocaine. For 8<sup>th</sup> and 10<sup>th</sup> graders we do not include heroin, narcotics, or sedatives. (N=387,718)

Web Figure 4. Hierarchical age-period-cohort estimates of period and cohort effects of low self-esteem among 8<sup>th</sup>, 10<sup>th</sup>, and 12<sup>th</sup> graders in the Monitoring the Future Study (1991-2019). A.) Period Effect; B.) Cohort Effect<sup>a</sup>

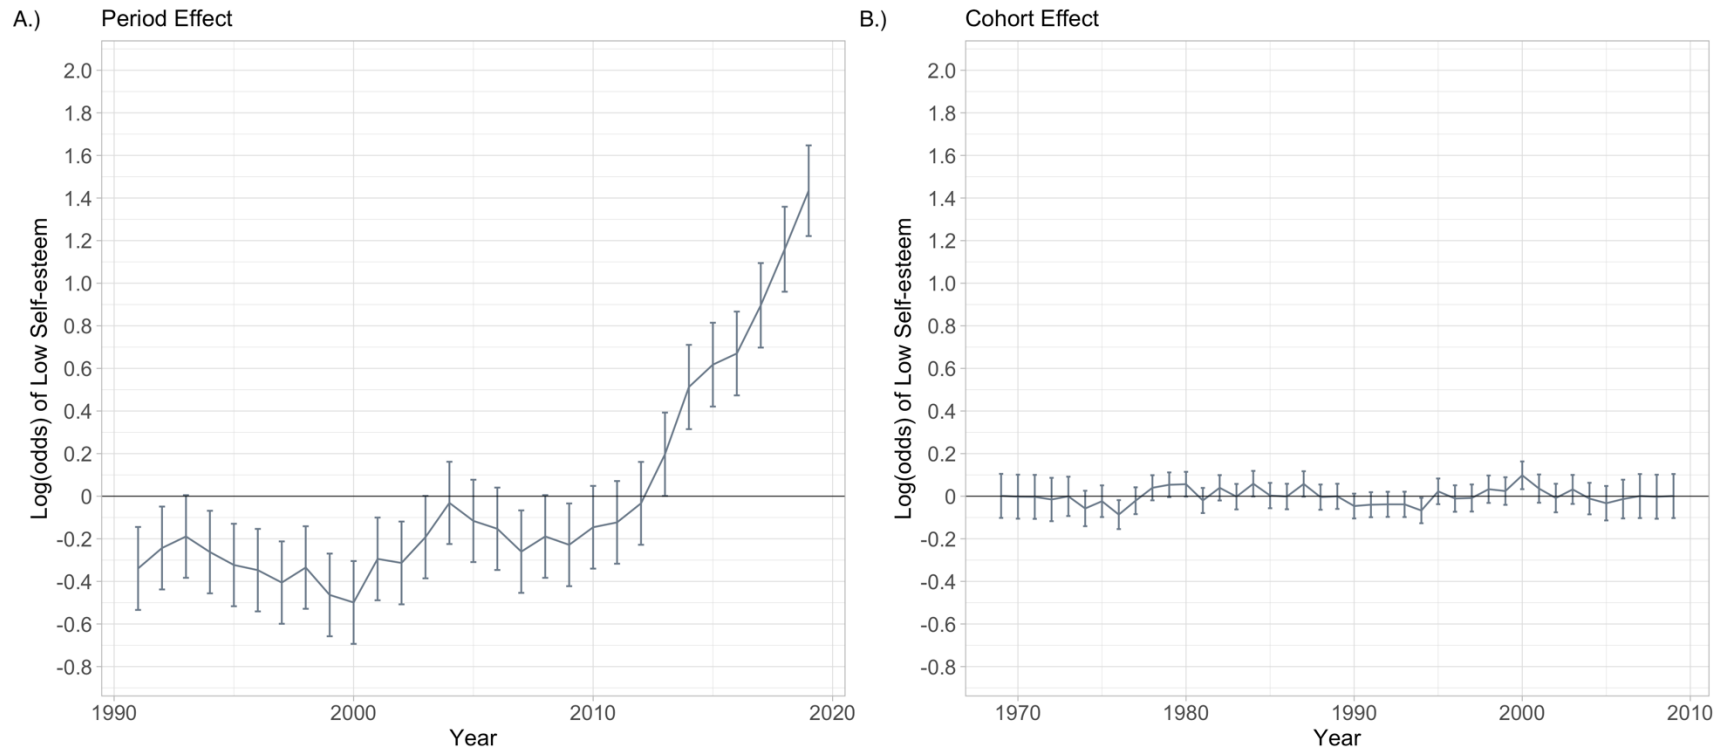

<sup>a</sup>Note: Model also adjusted for sex (male vs. female), race/ethnicity (non-Hispanic white, non-Hispanic Black, Hispanic, other), parental education (either parent had some college or less vs. completed college or more, as reported by the adolescent), GPA (B- or less vs. B or higher), survey implementation technique (paper vs. tablet), and past-year cannabis/alcohol/other drug use. Drugs in the “other substance use” category vary by grade: for 12<sup>th</sup> graders we include LSD, other hallucinogens, cocaine, amphetamines, sedatives, tranquilizers, heroin, narcotics, crack, and other forms of cocaine. For 8<sup>th</sup> and 10<sup>th</sup> graders we do not include heroin, narcotics, or sedatives. (N=389,443)

Web Figure 5. Hierarchical age-period-cohort estimates of period and cohort effects of depressive affect among 8<sup>th</sup>, 10<sup>th</sup>, and 12<sup>th</sup> graders in the Monitoring the Future Study (1991-2019). A.) Period Effect; B.) Cohort Effect<sup>a</sup>

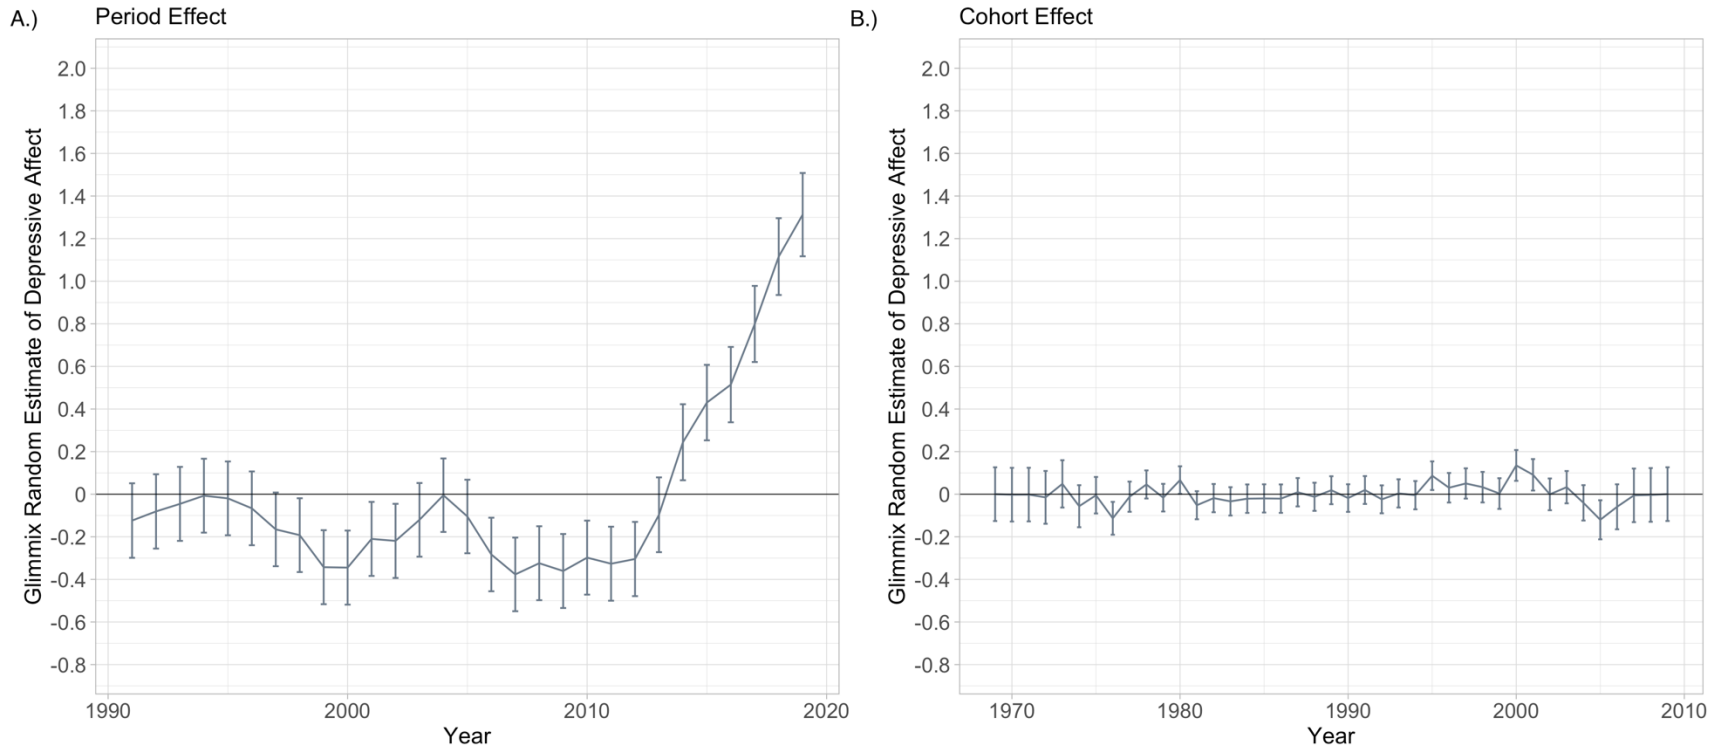

<sup>a</sup>Note: Model also adjusted for sex (male vs. female), race/ethnicity (non-Hispanic white, non-Hispanic Black, Hispanic, other), parental education (either parent had some college or less vs. completed college or more, as reported by the adolescent), GPA (B- or less vs. B or higher), survey implementation technique (paper vs. tablet), and past-year cannabis/alcohol/other drug use. Drugs in the “other substance use” category vary by grade: for 12th graders we include LSD, other hallucinogens, cocaine, amphetamines, sedatives, tranquilizers, heroin, narcotics, crack, and other forms of cocaine. For 8th and 10th graders we do not include heroin, narcotics, or sedatives. (N=370,570)

Web Figure 6. Hierarchical age-period estimates by sex of period effects of loneliness among 8<sup>th</sup>, 10<sup>th</sup>, and 12<sup>th</sup> graders in the Monitoring the Future Study (1991-2019)<sup>a</sup>

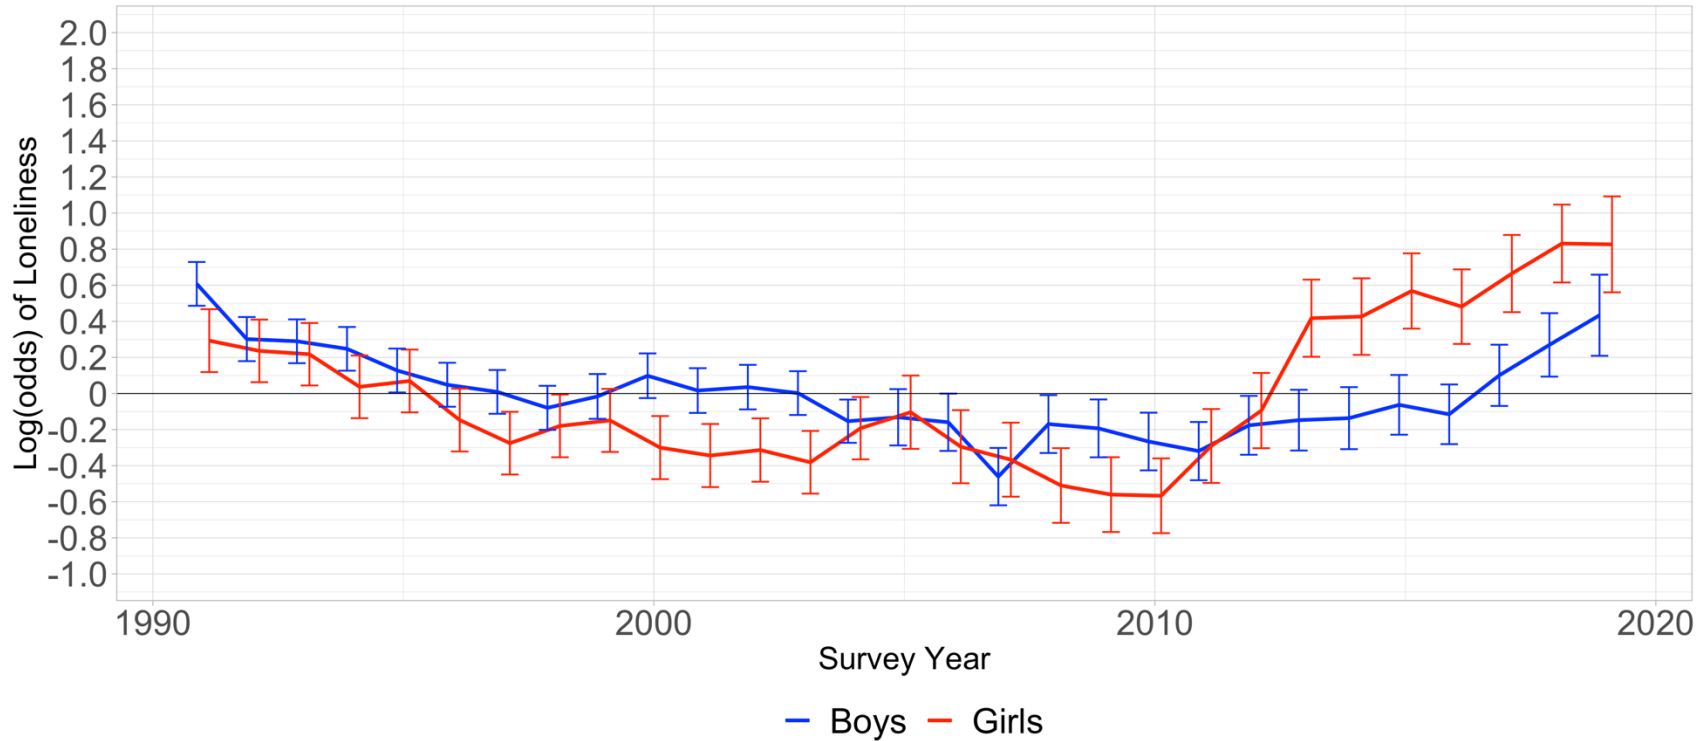

<sup>a</sup>Note: Model also adjusted for race/ethnicity (non-Hispanic white, non-Hispanic Black, Hispanic, other), parental education (either parent had some college or less vs. completed college or more, as reported by the adolescent), GPA (B- or less vs. B or higher), survey implementation technique (paper vs. tablet), and past-year cannabis/alcohol/other drug use. Drugs in the “other substance use” category vary by grade: for 12th graders we include LSD, other hallucinogens, cocaine, amphetamines, sedatives, tranquilizers, heroin, narcotics, crack, and other forms of cocaine. For 8th and 10th graders we do not include heroin, narcotics, or sedatives. (N=120,420 for girls, N=108,926 for boys)



Web Figure 7. Hierarchical age-period estimates by race/ethnicity of period effects of loneliness among 8<sup>th</sup>, 10<sup>th</sup>, and 12<sup>th</sup> graders in the Monitoring the Future Study (1991-2019)<sup>a</sup>

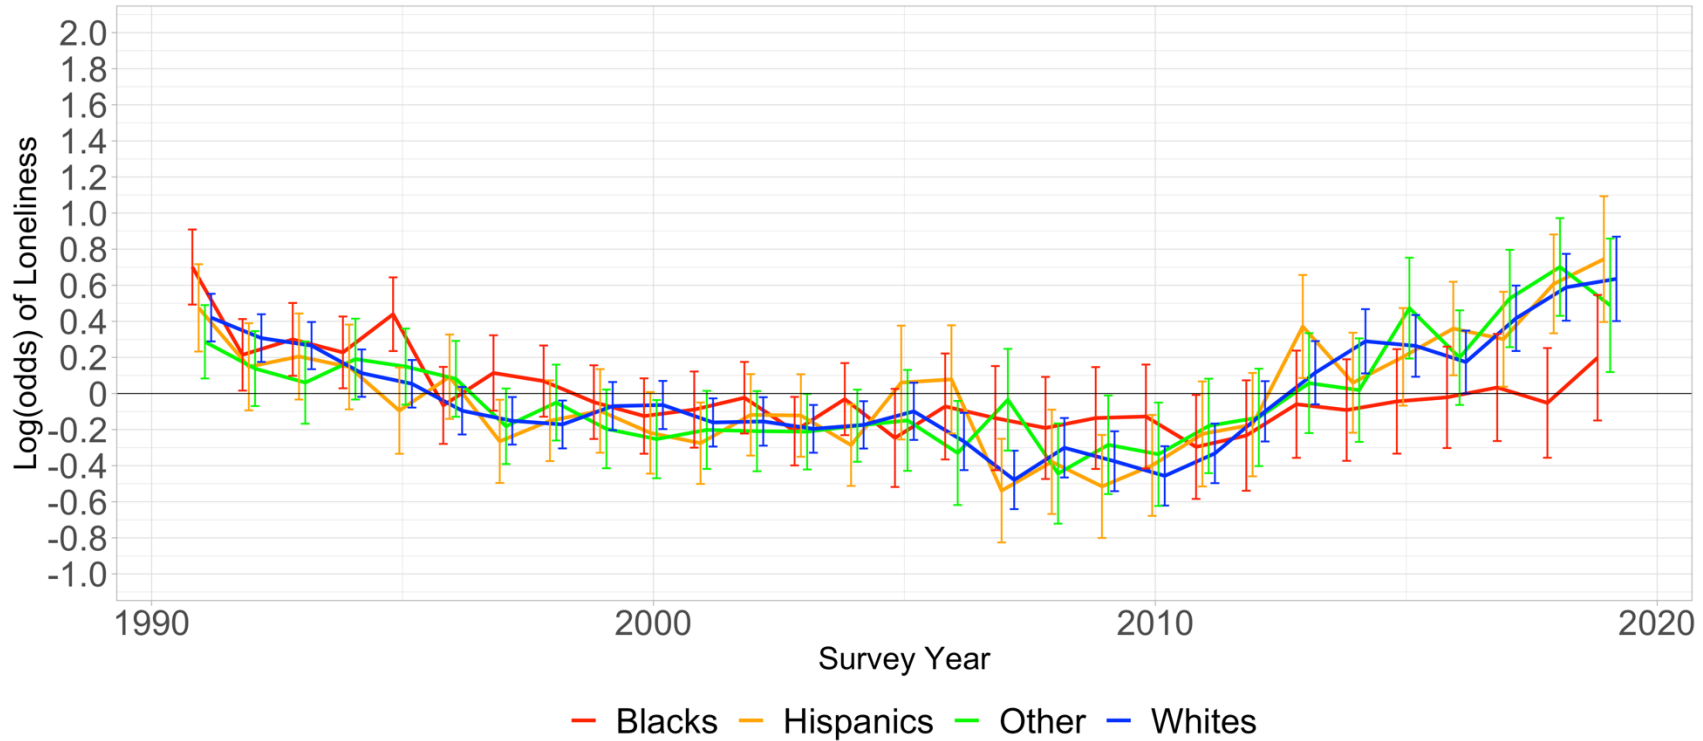

<sup>a</sup>Note: Model also adjusted for sex (male vs. female), parental education (either parent had some college or less vs. completed college or more, as reported by the adolescent), GPA (B- or less vs. B or higher), survey implementation technique (paper vs. tablet), and past-year cannabis/alcohol/other drug use. Drugs in the “other substance use” category vary by grade: for 12th graders we include LSD, other hallucinogens, cocaine, amphetamines, sedatives, tranquilizers, heroin, narcotics, crack, and other forms of cocaine. For 8th and 10th graders we do not include heroin, narcotics, or sedatives. (N=23,953 for Blacks, N=154,761 for Whites, N=24,029 for Hispanics, N=26,603 for other)

Web Figure 8. Hierarchical age-period estimates by parental education of period effects of loneliness among 8<sup>th</sup>, 10<sup>th</sup>, and 12<sup>th</sup> graders in the Monitoring the Future Study (1991-2019)<sup>a</sup>

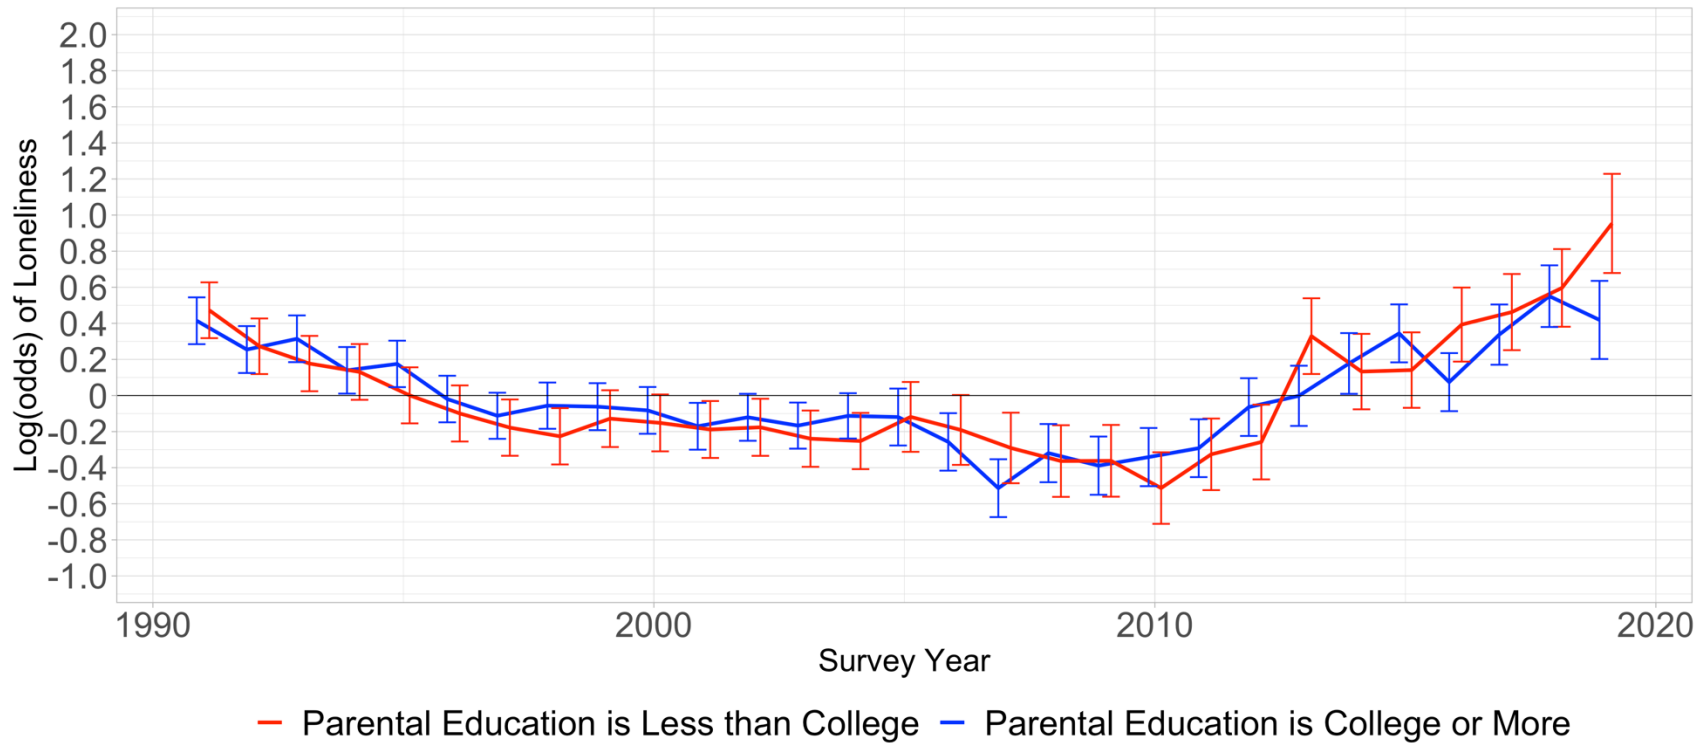

<sup>a</sup>Note: Model also adjusted for sex (male vs. female), race/ethnicity (non-Hispanic white, non-Hispanic Black, Hispanic, other), GPA (B- or less vs. B or higher), survey implementation technique (paper vs. tablet), and past-year cannabis/alcohol/other drug use. Drugs in the “other substance use” category vary by grade: for 12<sup>th</sup> graders we include LSD, other hallucinogens, cocaine, amphetamines, sedatives, tranquilizers, heroin, narcotics, crack, and other forms of cocaine. For 8<sup>th</sup> and 10<sup>th</sup> graders we do not include heroin, narcotics, or sedatives. (N=102,629 for parental education is less than college, N=126,717 for parental education is college or more)

Web Table 2. Multinomial Logistic Regression of Loneliness among 8<sup>th</sup>, 10<sup>th</sup>, and 12<sup>th</sup> graders in the Monitoring the Future Study (1991-2019), adjusting for race/ethnicity (non-Hispanic white, non-Hispanic Black, Hispanic, other), parental education (either parent had some college or less vs. completed college or more, as reported by the adolescent), GPA (B- or less vs. B or higher), survey implementation technique (paper vs. tablet), past-year cannabis/alcohol/other drug use, and the interaction between survey year and sex<sup>a</sup>

| Covariate                                                          | Parameter Estimate | (95% CI)         |
|--------------------------------------------------------------------|--------------------|------------------|
| Two-year Age Group (Ref=14-15)                                     |                    |                  |
| 10-11                                                              | -0.017             | (-0.115, 0.08)   |
| 12-13                                                              | -0.017             | (-0.021, -0.012) |
| 16-17                                                              | 0.02               | (0.016, 0.024)   |
| 18+                                                                | 0.095              | (0.084, 0.106)   |
| Past-year Alcohol Use (Ref=No)                                     |                    |                  |
| Yes                                                                | 0.015              | (0.01, 0.019)    |
| Past-year Cannabis Use (Ref=No)                                    |                    |                  |
| Yes                                                                | -0.037             | (-0.042, -0.031) |
| Past-year Other Drug Use (Ref=No)                                  |                    |                  |
| Yes                                                                | 0.055              | (0.049, 0.061)   |
| GPA (Ref=B- or Less)                                               |                    |                  |
| B or Greater                                                       | -0.036             | (-0.04, -0.032)  |
| Sex (Ref=Male)                                                     |                    |                  |
| Female                                                             | 0.127              | (0.123, 0.131)   |
| Survey Year                                                        | -0.002             | (-0.003, -0.002) |
| Survey Year * Sex (Ref=Male)                                       | 0.003              | (0.002, 0.003)   |
| Parental Education (Ref=Maximum Parental Education is Not College) |                    |                  |
| Parental Education is College or More                              | -0.021             | (-0.025, -0.018) |
| Race/Ethnicity (Ref=White)                                         |                    |                  |
| Black                                                              | 0.011              | (0.005, 0.017)   |
| Hispanic                                                           | -0.003             | (-0.009, 0.003)  |
| Other                                                              | 0.046              | (0.041, 0.052)   |
| Survey Mode (Ref=Paper)                                            |                    |                  |
| Tablet                                                             | 0.061              | (0.042, 0.079)   |

<sup>a</sup>Note: Drugs in the “other substance use” category vary by grade: for 12th graders we include LSD, other hallucinogens, cocaine, amphetamines, sedatives, tranquilizers, heroin, narcotics, crack, and other forms of cocaine. For 8th and 10th graders we do not include heroin, narcotics, or sedatives. (N=229,346)

Web Figure 9. Hierarchical age-period estimates of period effects of high self-derogation among 8<sup>th</sup>, 10<sup>th</sup>, and 12<sup>th</sup> graders in the Monitoring the Future Study (1991-2019)<sup>a</sup>

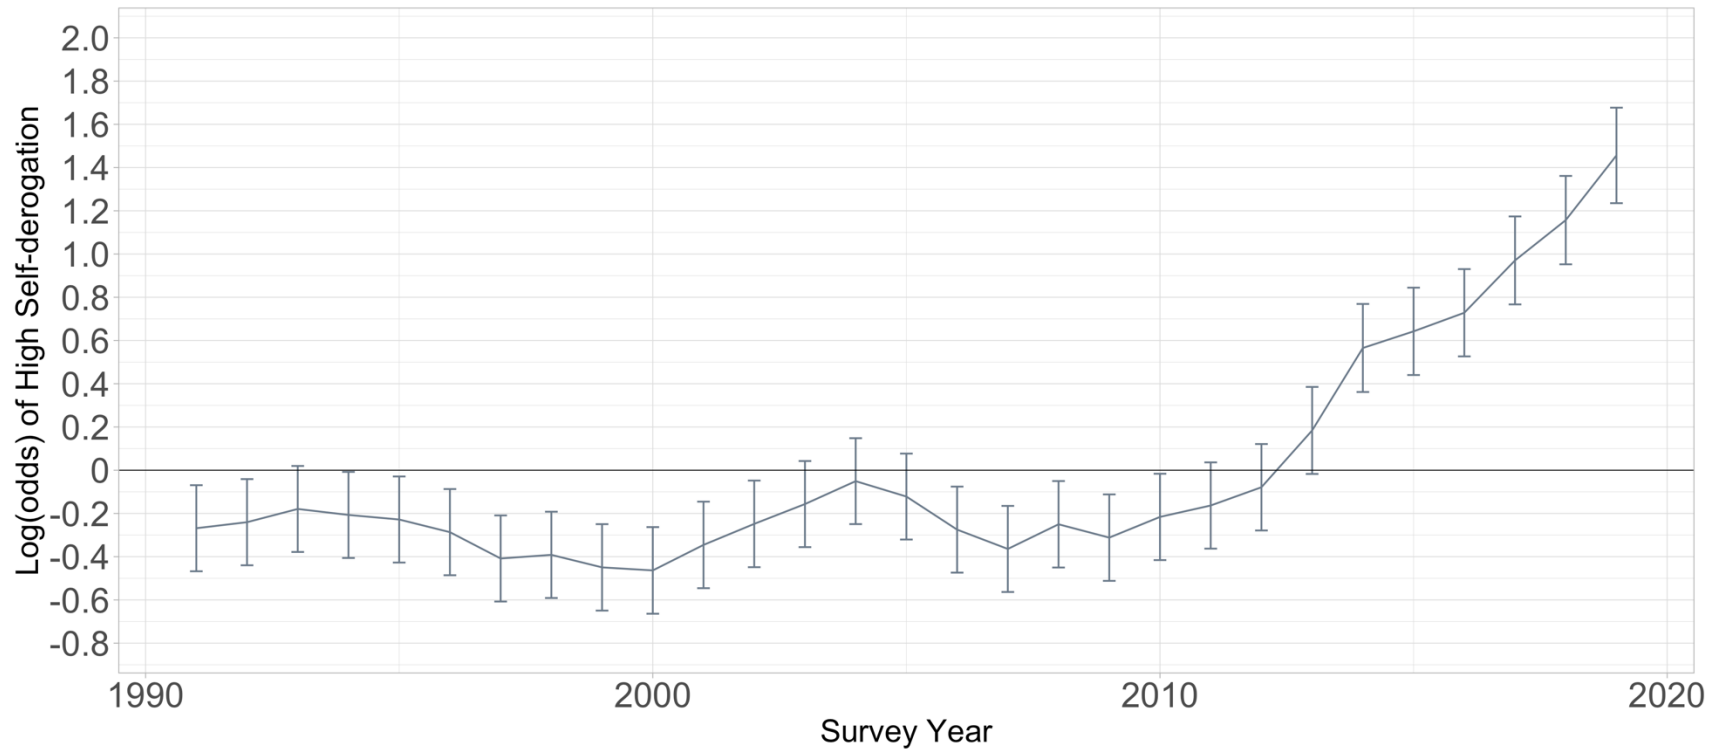

<sup>a</sup>Note: Model also adjusted for sex (male vs. female), race/ethnicity (non-Hispanic white, non-Hispanic Black, Hispanic, other), parental education (either parent had some college or less vs. completed college or more, as reported by the adolescent), GPA (B- or less vs. B or higher), survey implementation technique (paper vs. tablet), and past-year cannabis/alcohol/other drug use. Drugs in the “other substance use” category vary by grade: for 12th graders we include LSD, other hallucinogens, cocaine, amphetamines, sedatives, tranquilizers, heroin, narcotics, crack, and other forms of cocaine. For 8th and 10th graders we do not include heroin, narcotics, or sedatives. (N=387,718)

Web Figure 10. Hierarchical age-period estimates of period effects of low self-esteem among 8<sup>th</sup>, 10<sup>th</sup>, and 12<sup>th</sup> graders in the Monitoring the Future Study (1991-2019)<sup>a</sup>

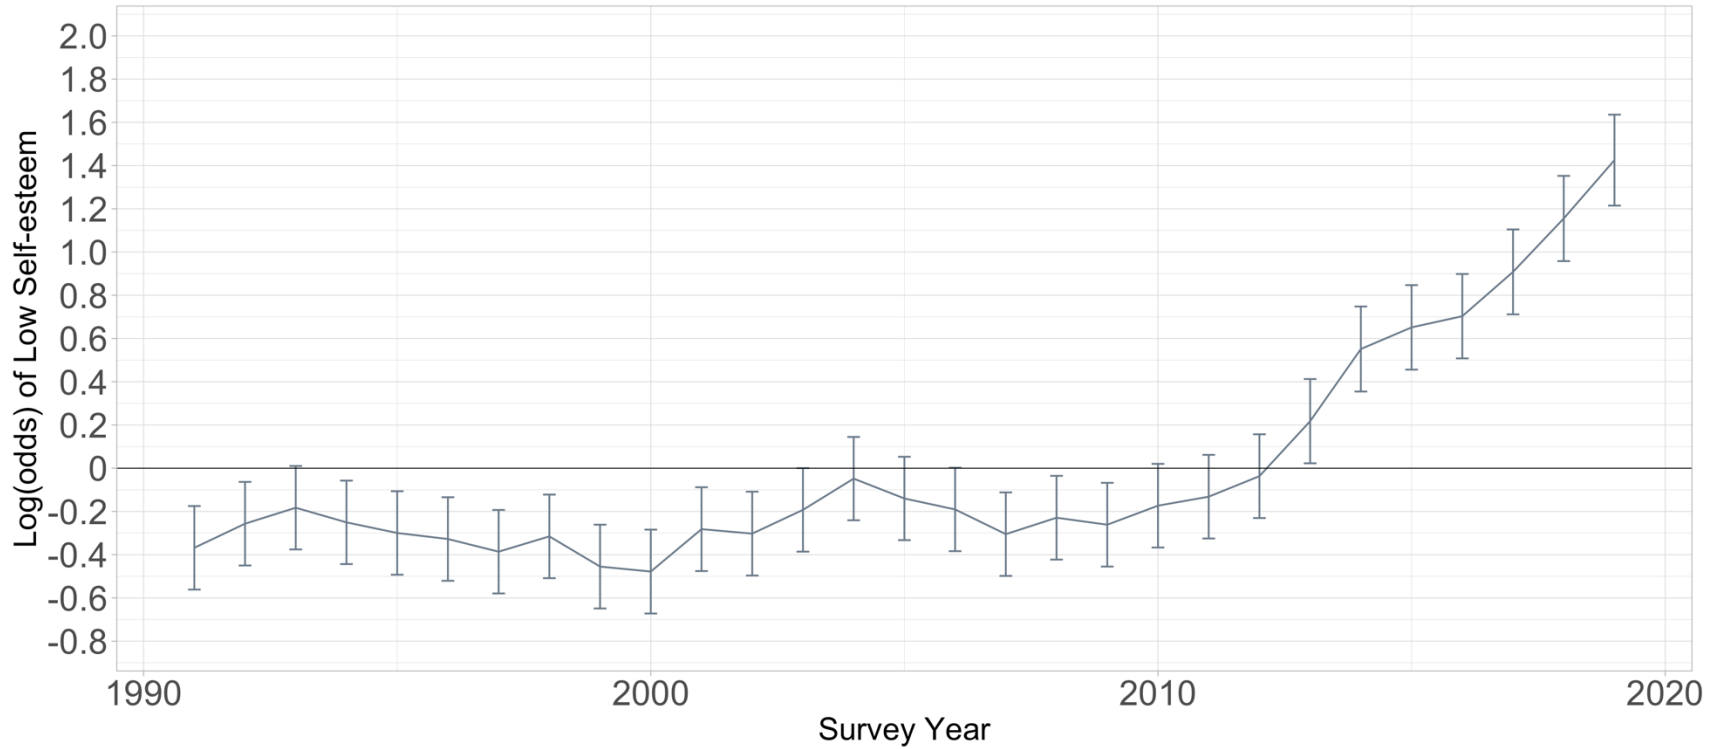

<sup>a</sup>Note: Model also adjusted for sex (male vs. female), race/ethnicity (non-Hispanic white, non-Hispanic Black, Hispanic, other), parental education (either parent had some college or less vs. completed college or more, as reported by the adolescent), GPA (B- or less vs. B or higher), survey implementation technique (paper vs. tablet), and past-year cannabis/alcohol/other drug use. Drugs in the “other substance use” category vary by grade: for 12th graders we include LSD, other hallucinogens, cocaine, amphetamines, sedatives, tranquilizers, heroin, narcotics, crack, and other forms of cocaine. For 8th and 10th graders we do not include heroin, narcotics, or sedatives. (N=389,443)

Web Figure 11. Hierarchical age-period estimates of period effects of depressive affect among 8<sup>th</sup>, 10<sup>th</sup>, and 12<sup>th</sup> graders in the Monitoring the Future Study (1991-2019)<sup>a</sup>

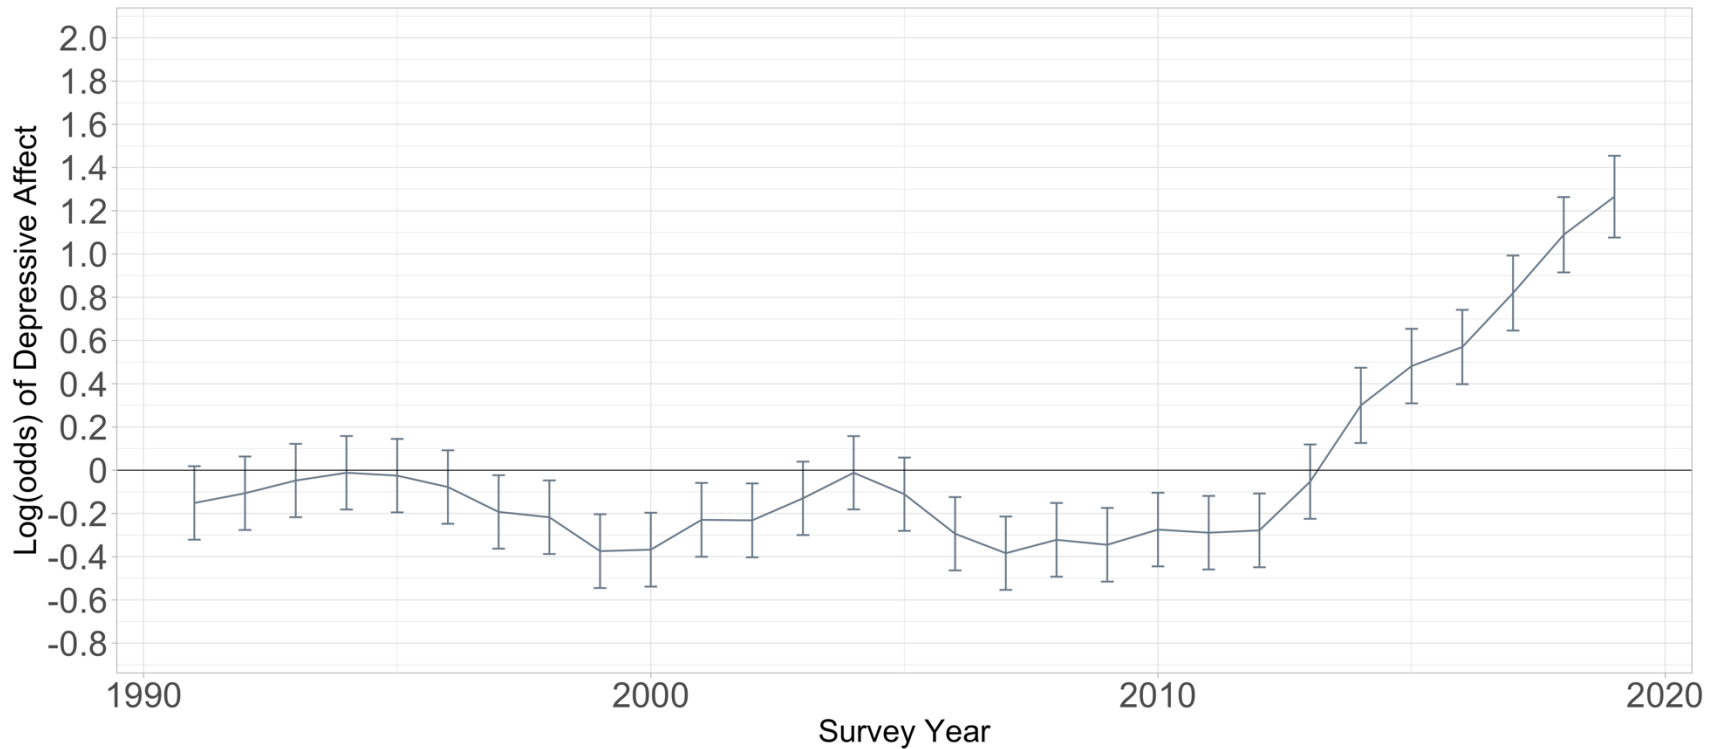

<sup>a</sup>Note: Model also adjusted for sex (male vs. female), race/ethnicity (non-Hispanic white, non-Hispanic Black, Hispanic, other), parental education (either parent had some college or less vs. completed college or more, as reported by the adolescent), GPA (B- or less vs. B or higher), survey implementation technique (paper vs. tablet), and past-year cannabis/alcohol/other drug use. Drugs in the “other substance use” category vary by grade: for 12th graders we include LSD, other hallucinogens, cocaine, amphetamines, sedatives, tranquilizers, heroin, narcotics, crack, and other forms of cocaine. For 8th and 10th graders we do not include heroin, narcotics, or sedatives. (N=370,570)

Web Figure 12. Sensitivity analysis of age-period-cohort estimates of loneliness among 8<sup>th</sup>, 10<sup>th</sup>, and 12<sup>th</sup> graders in the Monitoring the Future Study (1991-2019) using the intrinsic estimator. A.) Age, years; B.) Survey Year; C.) Birth Cohort Year (N=324,179)

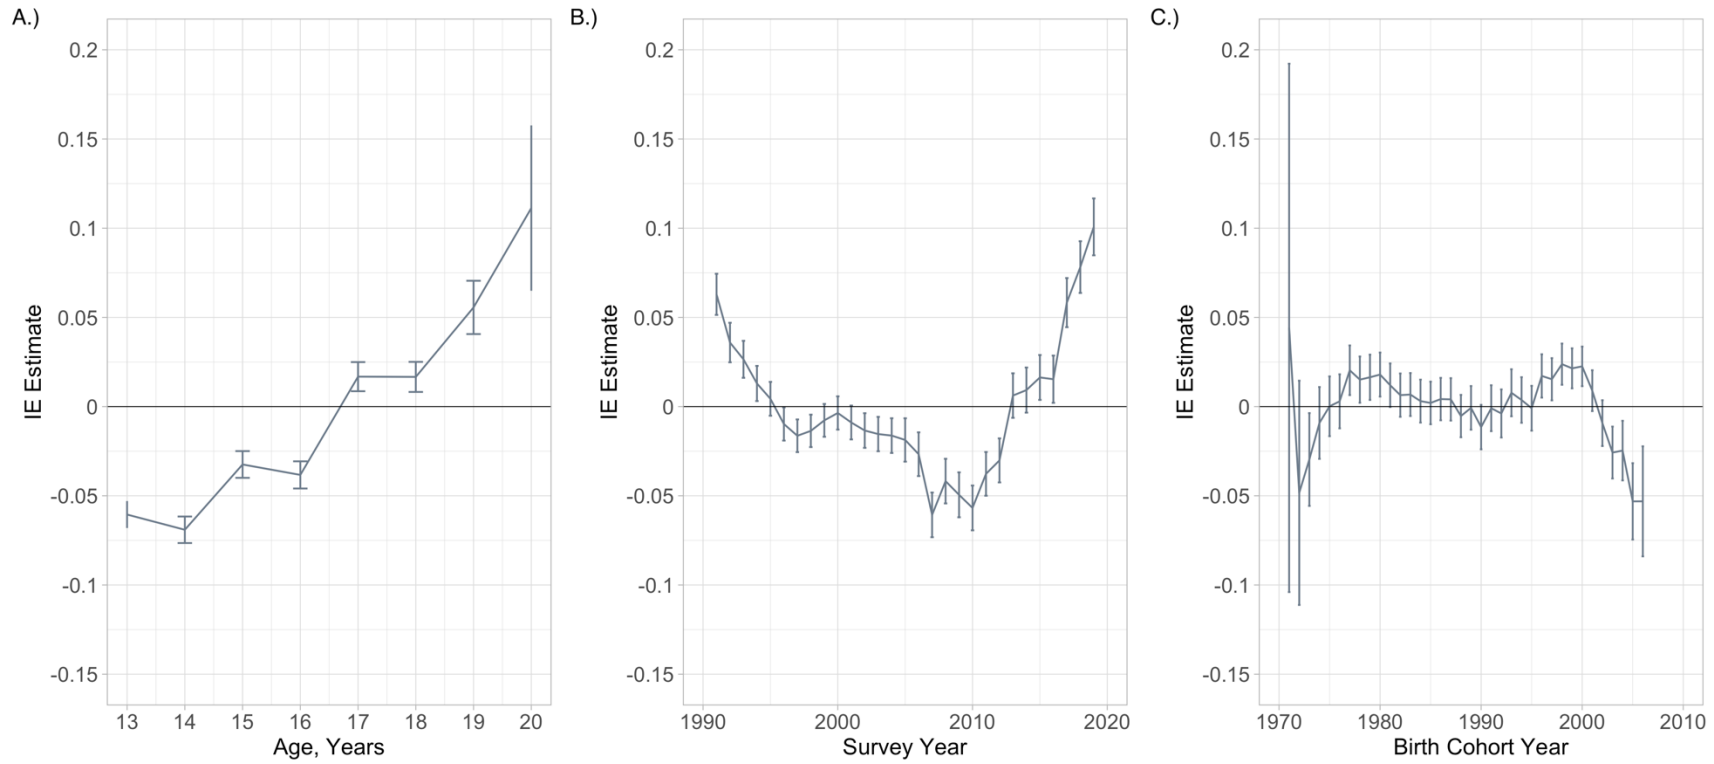

Supplement: web_material_kwac010.pdf [file web_material_kwac010.pdf]
